# Supplementary material
Source: Springer Nature journal article supplement (https://www.springermedizin.de/resource/supplementary/13030_2013_145_MOESM1_ESM.pdf/9644886)
Supplement: MOESM1 [file 9644886]

## Appendix

Table A1. Demographic and baseline clinical characteristics of patients with rheumatoid arthritis who were lost to follow-up (N = 46)

| Characteristics                          | N    | (%)    |
|------------------------------------------|------|--------|
| Age, yrs, mean (SD) *                    | 55.9 | (11.2) |
| Female†                                  | 41   | (89.1) |
| Education completed‡                     |      |        |
| Junior high school                       | 9    | (19.6) |
| High school                              | 23   | (50.0) |
| Junior college or higher                 | 14   | (30.4) |
| Disease duration§, yrs, mean (SD)        | 11.5 | (10.4) |
| ACR class‡                               |      |        |
| 1                                        | 13   | (28.3) |
| 2                                        | 23   | (50.0) |
| 3                                        | 10   | (21.7) |
| Joint stage‡                             |      |        |
| 1                                        | 7    | (15.2) |
| 2                                        | 11   | (23.9) |
| 3                                        | 8    | (17.4) |
| 4                                        | 20   | (43.5) |
| Afflicted joint* count (0-49), mean (SD) | 12.1 | (10.4) |
| No. of extra-articular complications§    |      |        |
| 0                                        | 42   | (91.3) |
| 1                                        | 2    | (4.4)  |
| 2+                                       | 2    | (4.4)  |
| C-reactive protein§, mg/dl, mean (SD)    | 1.88 | (1.69) |
| Medical treatments                       |      |        |
| Methotrexate use†                        | 16   | (34.8) |
| Corticosteroids use†                     | 18   | (39.1) |
| Other DMARDs use†                        | 25   | (54.4) |

SD: standard deviation, ACR: American College of Rheumatology, DMARDs: disease modifying anti-rheumatic drugs. \*See text for explanation. Values are N (%) unless otherwise stated. No statistical difference was found in the distribution of the participants lost to study and those for whom data was available for analysis (N = 460, see Table 1) (Student's t-test\*, chi-square test†, Mantel-Haenszel chi-square test‡, or the Wilcoxon rank sum test§).
